# Supplementary material for: Human-modified biogeographic patterns and conservation in game birds: The dilemma of the black francolin (Francolinus francolinus, Phasianidae) in Pakistan
Source: PLOS journal article supplement (doi:10.1371/journal.pone.0205059), 2018-10-05
Supplement: S3 (10.1371/journal.pone.0205059.s003) [file journal.pone.0205059.s003]

**S3 Table. Multi-locus  $P_{ID}$  and  $P_{ID\text{sib}}$ .** Multi-locus  $P_{ID}$  (i.e., the probability that two individuals drawn at random share identical genotypes) and  $P_{ID\text{sib}}$  (i.e., the probability of identity among siblings) data are provided. Loci are sorted according to the increasing order of their  $P_{ID}$  and  $P_{ID\text{sib}}$  single-locus values (i.e., the locus at the top is the most informative one), and a sequentially multi-loci  $P_{ID}$  ( $P_{ID\text{sib}}$ ) is reported for each locus. See Forcina et al. [46] for details on the loci employed in the present study.

| Locus    | $P_{ID}$             | $P_{ID\text{sib}}$   |
|----------|----------------------|----------------------|
| MCW 252  | $1.2 \times 10^{-2}$ | $2.9 \times 10^{-1}$ |
| MCW 212  | $1.3 \times 10^{-3}$ | $1.2 \times 10^{-1}$ |
| MCW 104  | $2.2 \times 10^{-4}$ | $5.5 \times 10^{-2}$ |
| MCW 146  | $4.9 \times 10^{-5}$ | $2.8 \times 10^{-2}$ |
| MCW 295  | $1.2 \times 10^{-5}$ | $1.4 \times 10^{-2}$ |
| Aru 1.23 | $4.1 \times 10^{-6}$ | $8.5 \times 10^{-3}$ |
| MCW 127  | $1.5 \times 10^{-6}$ | $5.4 \times 10^{-3}$ |
| LEI 30   | $8.6 \times 10^{-7}$ | $4.1 \times 10^{-3}$ |
| MCW 280  | $7.4 \times 10^{-7}$ | $3.8 \times 10^{-3}$ |
